# Supplementary material for: Comparative Proteomic Analysis of Young and Adult Bull (Bos taurus) Cryopreserved Semen
Source: MDPI journal article supplement (doi:10.3390/ani11072013), 2021-07-05
Supplement: s1 [file s1]

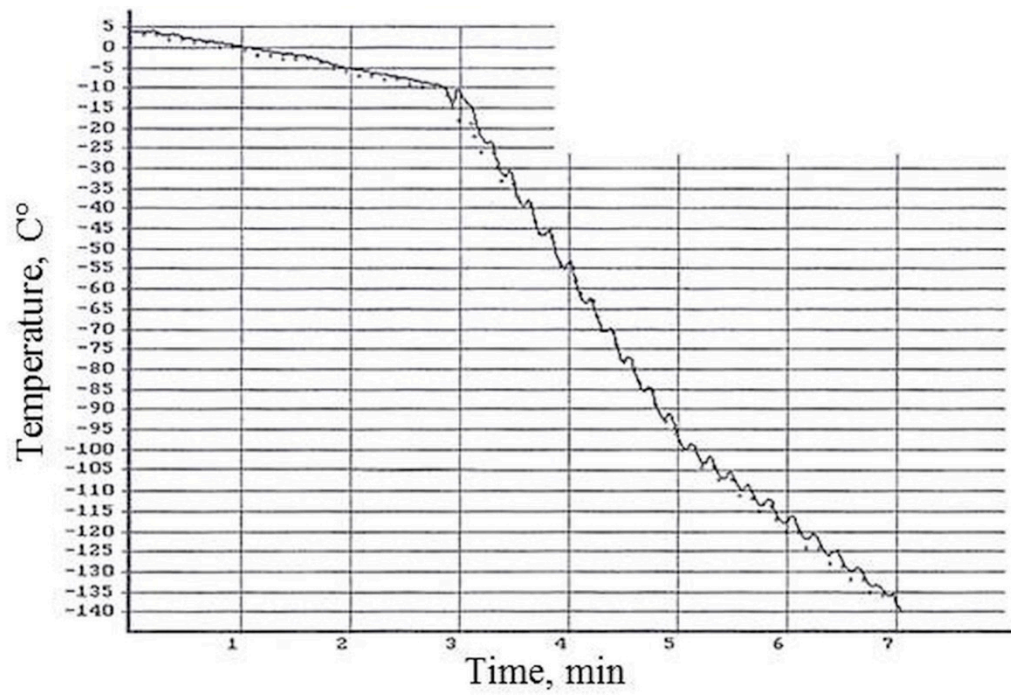

**Fig. S1.** Programmed and recorded freezing curve of bull semen; dotted line – programmed rate of freezing, continuous line – recorded rate of freezing.

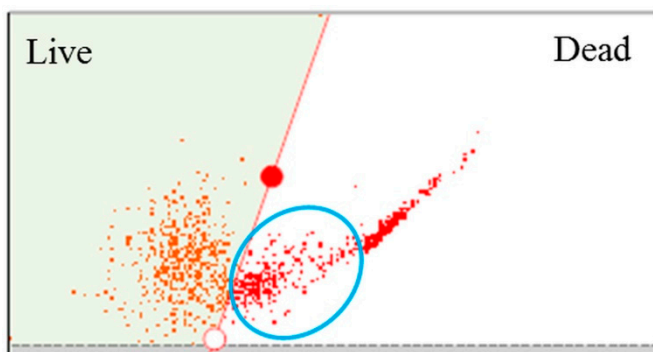

**Fig. S2.** Representative picture of viability measurement of thawed bull semen, showing three populations of spermatozoa – live, dead, and third intermediate population, marked with blue oval.

**Table S1.** Mixing and dying scheme of samples of spermatozoa extract and supernatant of thawed bull sperm from young and adult bulls; N = 6 for each group

| Gel # | Cy2             | Cy3     | Cy5     |
|-------|-----------------|---------|---------|
| 1     | Pooled Standard | Young 1 | Adult 3 |
| 2     | Pooled Standard | Adult 1 | Young 4 |
| 3     | Pooled Standard | Young 2 | Adult 4 |
| 4     | Pooled Standard | Adult 2 | Young 5 |
| 5     | Pooled Standard | Young 3 | Adult 6 |
| 6     | Pooled Standard | Adult 5 | Young 6 |

**Table S2.** Molecular and cellular functions performed by proteins changing in adult bulls cryopreserved spermatozoa in comparison to young bulls cryopreserved spermatozoa

| Categories                                                                           | Diseases or Functions Annotation        | p-Value  | Molecules                | # Molecules |
|--------------------------------------------------------------------------------------|-----------------------------------------|----------|--------------------------|-------------|
| Energy Production, Nucleic Acid Metabolism, Small Molecule Biochemistry              | Synthesis of ATP                        | 6.99E-07 | ALDOA, HSPD1, PKM, SOD1  | 4           |
| Free Radical Scavenging, Molecular Transport                                         | Quantity of hydrogen peroxide           | 1.39E-06 | PARK7, PRDX5, SOD1       | 3           |
| Free Radical Scavenging, Molecular Transport                                         | Accumulation of hydrogen peroxide       | 1.22E-05 | PRDX5, SOD1              | 2           |
| Free Radical Scavenging                                                              | Modification of hydrogen peroxide       | 3.39E-05 | PRDX5, SOD1              | 2           |
| Free Radical Scavenging, Small Molecule Biochemistry                                 | Metabolism of hydrogen peroxide         | 9.39E-05 | PARK7, PRDX5, SOD1       | 3           |
| Cellular Function and Maintenance                                                    | Homeostasis of muscle cells             | 9.99E-05 | ALDOA, SOD1              | 2           |
| Lipid Metabolism, Small Molecule Biochemistry                                        | Synthesis of fatty acid                 | 1.38E-04 | ACADVL, PARK7, PKM, SOD1 | 4           |
| Free Radical Scavenging, Small Molecule Biochemistry                                 | Degradation of hydrogen peroxide        | 1.40E-04 | PRDX5, SOD1              | 2           |
| Carbohydrate Metabolism, Energy Production                                           | Metabolism of pyruvic acid              | 1.75E-04 | ALDOA, PKM               | 2           |
| Cellular Function and Maintenance                                                    | Respiration of mitochondria             | 3.35E-04 | PKM, SOD1                | 2           |
| Cell Morphology, Cellular Function and Maintenance                                   | Mitochondrial membrane potential        | 3.70E-04 | PARK7, SOD1              | 2           |
| Cellular Assembly and Organization                                                   | Binding of zona pellucida               | 3.87E-04 | ALDOA, ZBP2              | 2           |
| Drug Metabolism, Protein Synthesis                                                   | Metabolism of glutathione               | 4.63E-04 | GSTM3, SOD1              | 2           |
| Cell-To-Cell Signaling and Interaction, Reproductive System Development and Function | Binding of sperm                        | 5.67E-04 | ALDOA, ZBP2              | 2           |
| Cell Morphology, Cellular Function and Maintenance                                   | Transmembrane potential of mitochondria | 7.43E-04 | HSPD1, PARK7, SOD1       | 3           |
| Drug Metabolism                                                                      | Metabolism of xenobiotic                | 1.05E-03 | GSTM3, GSTO2             | 2           |
| Amino Acid Metabolism, Small Molecule                                                | Synthesis of amino acids                | 1.27E-03 | PARK7, PKM               | 2           |

|                                                                                                           |                                         |          |                                       |  |   |
|-----------------------------------------------------------------------------------------------------------|-----------------------------------------|----------|---------------------------------------|--|---|
| Biochemistry                                                                                              |                                         |          |                                       |  |   |
| Organismal Injury and Abnormalities                                                                       | Oxidative stress                        | 1.51E-03 | PRDX5, SOD1                           |  | 2 |
| Cell Death and Survival                                                                                   | Cell death of nervous tissue cell lines | 1.65E-03 | PARK7, SOD1                           |  | 2 |
| Cell Signaling, Small Molecule Biochemistry                                                               | Synthesis of nitric oxide               | 1.69E-03 | HSPD1, PARK7, SOD1                    |  | 3 |
| Drug Metabolism, Molecular Transport, Small Molecule Biochemistry                                         | Concentration of glutathione            | 1.96E-03 | PKM, SOD1                             |  | 2 |
| Cell Death and Survival, Organismal Injury and Abnormalities                                              | Cell death of epithelial cell lines     | 1.96E-03 | HSPD1, PARK7, SOD1                    |  | 3 |
| Carbohydrate Metabolism, Small Molecule Biochemistry                                                      | Metabolism of D-hexose                  | 2.24E-03 | ALDOA, PKM                            |  | 2 |
| Cell Death and Survival                                                                                   | Cell viability of brain cells           | 2.60E-03 | PARK7, SOD1                           |  | 2 |
| Cell Morphology, Cellular Assembly and Organization                                                       | Abnormal morphology of Nucleus          | 2.64E-03 | SOD1, ZBP2                            |  | 2 |
| Cell-To-Cell Signaling and Interaction, Drug Metabolism, Molecular Transport, Small Molecule Biochemistry | Concentration of dopamine               | 2.92E-03 | PARK7, SOD1                           |  | 2 |
| Cellular Assembly and Organization, Cellular Function and Maintenance                                     | Organization of cytoplasm               | 3.35E-03 | ALDOA, EFHD1, KRT6A, PARK7, PKM, SOD1 |  | 6 |
| Behavior                                                                                                  | Locomotion                              | 3.41E-03 | ACADVL, PARK7, SOD1                   |  | 3 |
| Cell Signaling                                                                                            | Activation of enzyme                    | 3.75E-03 | HSPD1, PARK7, SOD1                    |  | 3 |
| Carbohydrate Metabolism                                                                                   | Glycolysis of cells                     | 4.66E-03 | ALDOA, PKM                            |  | 2 |
| Energy Production, Molecular Transport, Nucleic Acid Metabolism, Small Molecule Biochemistry              | Concentration of ATP                    | 4.84E-03 | ALDOA, PKM                            |  | 2 |
| Cell Morphology, Cellular Assembly and Organization                                                       | Morphology of mitochondria              | 5.15E-03 | HSPD1, SOD1                           |  | 2 |
| Organismal Functions                                                                                      | Energy expenditure                      | 5.53E-03 | ACADVL, SOD1                          |  | 2 |
| Carbohydrate Metabolism                                                                                   | Accumulation of carbohydrate            | 5.93E-03 | PKM, SOD1                             |  | 2 |
| Embryonic Development, Organismal Development, Reproductive System Development and Function               | Fertilization                           | 6.62E-03 | PARK7, ZBP2                           |  | 2 |
| Inflammatory Response                                                                                     | Inflammatory response                   | 6.82E-03 | HSPD1, PARK7, PRDX5, SOD1             |  | 4 |
| Cell Death and Survival                                                                                   | Apoptosis of neurons                    | 7.24E-03 | HSPD1, PARK7, SOD1                    |  | 3 |
| Cell Death and Survival                                                                                   | Cell viability of carcinoma cell lines  | 7.80E-03 | PARK7, PKM                            |  | 2 |

|                                                                                                                                       |                                        |          |                                        |   |
|---------------------------------------------------------------------------------------------------------------------------------------|----------------------------------------|----------|----------------------------------------|---|
| Cellular Compromise, Cellular Function and Maintenance                                                                                | Endoplasmic reticulum stress response  | 8.10E-03 | HSPD1, SOD1                            | 2 |
| Inflammatory Response, Organismal Injury and Abnormalities                                                                            | Inflammation of organ                  | 8.26E-03 | ACADVL, ALDOA, KRT6A, PKM, SOD1        | 5 |
| Cell Death and Survival                                                                                                               | Cell death of hepatoma cell lines      | 9.72E-03 | PKM, SOD1                              | 2 |
| Organ Morphology, Skeletal and Muscular System Development and Function                                                               | Morphology of skeletal muscle          | 1.08E-02 | ACADVL, SOD1                           | 2 |
| Cellular Movement                                                                                                                     | Migration of cells                     | 1.08E-02 | ALDOA, HSPD1, PARK7, PKM, SOD1, TUBB2B | 6 |
| Lipid Metabolism, Small Molecule Biochemistry                                                                                         | Homeostasis of lipid                   | 1.08E-02 | ACADVL, SOD1                           | 2 |
| Protein Degradation, Protein Synthesis                                                                                                | Stabilization of protein               | 1.10E-02 | HSPD1, PARK7                           | 2 |
| Cell Death and Survival                                                                                                               | Cell death of neuroblastoma cell lines | 1.11E-02 | PARK7, SOD1                            | 2 |
| Skeletal and Muscular System Development and Function                                                                                 | Morphology of muscle                   | 1.19E-02 | ACADVL, PARK7, SOD1                    | 3 |
| Cellular Assembly and Organization, Cellular Function and Maintenance                                                                 | Organization of cytoskeleton           | 1.20E-02 | ALDOA, EFHD1, KRT6A, PKM, SOD1         | 5 |
| Carbohydrate Metabolism                                                                                                               | Quantity of carbohydrate               | 1.32E-02 | ACADVL, PKM, SOD1                      | 3 |
| DNA Replication, Recombination, and Repair                                                                                            | DNA damage                             | 1.41E-02 | PARK7, SOD1                            | 2 |
| Cellular Assembly and Organization, Cellular Function and Maintenance                                                                 | Organization of filaments              | 1.47E-02 | ALDOA, SOD1                            | 2 |
| Cellular Assembly and Organization                                                                                                    | Organization of organelle              | 1.61E-02 | ALDOA, PARK7, SOD1                     | 3 |
| Cell Death and Survival                                                                                                               | Cell death of connective tissue cells  | 1.73E-02 | HSPD1, PARK7, SOD1                     | 3 |
| Cell-To-Cell Signaling and Interaction, Hematological System Development and Function, Immune Cell Trafficking, Inflammatory Response | Activation of macrophages              | 1.77E-02 | HSPD1, SOD1                            | 2 |
| Cell Death and Survival, Nervous System Development and Function                                                                      | Cell viability of neurons              | 1.77E-02 | PARK7, SOD1                            | 2 |
| Skeletal and Muscular System Development and Function                                                                                 | Muscle contraction                     | 1.84E-02 | ALDOA, SOD1                            | 2 |
| Protein Degradation, Protein Synthesis                                                                                                | Catabolism of protein                  | 1.92E-02 | HSPD1, PARK7, SOD1                     | 3 |
| Cellular Function and Maintenance                                                                                                     | Cellular homeostasis                   | 1.92E-02 | ALDOA, HSPD1, PARK7, PKM, SOD1         | 5 |
| Carbohydrate Metabolism                                                                                                               | Metabolism of carbohydrate             | 1.94E-02 | ALDOA, GSTO2, PKM                      | 3 |
| Cell Signaling, Post-Translational Modification                                                                                       | Activation of Protein                  | 1.98E-02 | PARK7, SOD1                            | 2 |

|                                                      |                                       |          |                                              |   |
|------------------------------------------------------|---------------------------------------|----------|----------------------------------------------|---|
|                                                      | kinase                                |          |                                              |   |
| Cell Death and Survival                              | Cytolysis                             | 2.19E-02 | ALDOA, KRT6A                                 | 2 |
| Cell Morphology, Organismal Injury and Abnormalities | Hypertrophy of cells                  | 2.59E-02 | PARK7, SOD1                                  | 2 |
| Cell Morphology, Cellular Function and Maintenance   | Autophagy of cells                    | 2.77E-02 | PKM, SOD1                                    | 2 |
| Cell Death and Survival                              | Apoptosis of tumor cell lines         | 3.19E-02 | HSPD1, PARK7, PKM, SOD1                      | 4 |
| Cellular Growth and Proliferation                    | Colony formation of tumor cell lines  | 3.21E-02 | PKM, SOD1                                    | 2 |
| Nervous System Development and Function              | Sensation                             | 3.47E-02 | PKM, SOD1                                    | 2 |
| Cell Death and Survival                              | Cell death of carcinoma cell lines    | 3.68E-02 | PKM, SOD1                                    | 2 |
| Cell Death and Survival                              | Apoptosis                             | 4.15E-02 | ALDOA, HSPD1, PARK7, PKM, PRDX5, SOD1        | 6 |
| Reproductive System Development and Function         | Fertility                             | 4.17E-02 | SOD1, ZPBP2                                  | 2 |
| Free Radical Scavenging                              | Production of reactive oxygen species | 4.25E-02 | PARK7, SOD1                                  | 2 |
| Cell Death and Survival, Embryonic Development       | Cell death of embryonic cell lines    | 4.28E-02 | PARK7, SOD1                                  | 2 |
| Cell Death and Survival                              | Cell death                            | 4.37E-02 | ALDOA, HSPD1, KRT6A, PARK7, PKM, PRDX5, SOD1 | 7 |
| Cell Death and Survival                              | Cell viability                        | 4.82E-02 | HSPD1, PARK7, PKM, SOD1                      | 4 |

---

**Table S3.** Molecular and cellular functions performed by proteins changing in adult bulls supernatant of cryopreserved semen in comparison to young bulls supernatant of cryopreserved semen

| Categories                                                                                                                                                                                              | Diseases or Functions Annotation            | p-Value  | Molecules             | # Molecules |
|---------------------------------------------------------------------------------------------------------------------------------------------------------------------------------------------------------|---------------------------------------------|----------|-----------------------|-------------|
| Cell Morphology                                                                                                                                                                                         | Morphology of leukocytes                    | 2.40E-06 | B2M, NGF, NPC2, PTGDS | 4           |
| Cell Morphology, Inflammatory Response                                                                                                                                                                  | Morphology of phagocytes                    | 1.14E-05 | NGF, NPC2, PTGDS      | 3           |
| Cell Morphology, Hematological System Development and Function, Hypersensitivity Response, Inflammatory Response                                                                                        | Morphology of mast cells                    | 1.44E-05 | NGF, PTGDS            | 2           |
| Cardiovascular System Development and Function, Cell Morphology, Cellular Development, Cellular Function and Maintenance, Cellular Growth and Proliferation, Organismal Development, Tissue Development | Morphogenesis of vascular endothelial cells | 1.57E-05 | NGF, TIMP2            | 2           |
| Lipid Metabolism, Small Molecule Biochemistry                                                                                                                                                           | Synthesis of prostaglandin                  | 1.64E-05 | NGF, NPC2, PTGDS      | 3           |
| Lipid Metabolism, Small Molecule Biochemistry                                                                                                                                                           | Synthesis of prostaglandin D2               | 3.48E-05 | NPC2, PTGDS           | 2           |
| Cell Death and Survival                                                                                                                                                                                 | Apoptosis of oligodendrocytes               | 5.34E-05 | NGF, PTGDS            | 2           |
| Hematological System Development and Function, Immune Cell Trafficking, Inflammatory Response, Tissue Development                                                                                       | Accumulation of leukocytes                  | 7.18E-05 | B2M, PTGDS, TIMP2     | 3           |
| Molecular Transport, Small Molecule Biochemistry                                                                                                                                                        | Release of histamine                        | 7.28E-05 | B2M, NGF              | 2           |
| Cellular Movement, Hematological System Development and Function, Immune Cell Trafficking, Inflammatory Response                                                                                        | Migration of phagocytes                     | 8.16E-05 | NGF, PTGDS, TIMP2     | 3           |
| Immunological Disease                                                                                                                                                                                   | Abnormal morphology of immune system        | 1.19E-04 | B2M, NPC2, PTGDS      | 3           |
| Hematological System Development and Function, Organismal Functions                                                                                                                                     | Flow of blood                               | 1.21E-04 | NGF, PTGDS            | 2           |
| Cell-To-Cell Signaling and Interaction, Drug Metabolism, Molecular Transport, Small Molecule                                                                                                            | Release of dopamine                         | 1.58E-04 | NGF, TIMP2            | 2           |

|                                                                                                                   |                                   |          |                       |  |   |
|-------------------------------------------------------------------------------------------------------------------|-----------------------------------|----------|-----------------------|--|---|
| Biochemistry                                                                                                      |                                   |          |                       |  |   |
| Cell Death and Survival                                                                                           | Cell death of leukemia cell lines | 1.58E-04 | B2M, NGF, NPC2        |  | 3 |
| Organismal Injury and Abnormalities, Tissue Morphology                                                            | Size of lesion                    | 1.84E-04 | NGF, PTGDS, TIMP2     |  | 3 |
| Hematological System Development and Function, Tissue Morphology                                                  | Quantity of leukocytes            | 1.96E-04 | B2M, NGF, NPC2, TIMP2 |  | 4 |
| DNA Replication, Recombination, and Repair                                                                        | Synthesis of DNA                  | 2.77E-04 | NGF, PTGDS, TIMP2     |  | 3 |
| Cellular Movement, Hematological System Development and Function, Immune Cell Trafficking, Inflammatory Response  | Migration of monocytes            | 3.11E-04 | NGF, TIMP2            |  | 2 |
| Nervous System Development and Function, Tissue Morphology                                                        | Quantity of neurons               | 3.30E-04 | B2M, NGF, NPC2        |  | 3 |
| Hematological System Development and Function, Inflammatory Response, Tissue Morphology                           | Quantity of phagocytes            | 3.68E-04 | B2M, NGF, TIMP2       |  | 3 |
| Cardiovascular System Development and Function, Tissue Morphology                                                 | Permeability of blood vessel      | 3.82E-04 | NGF, TIMP2            |  | 2 |
| Cell Morphology, Nervous System Development and Function, Tissue Morphology                                       | Size of neurons                   | 3.82E-04 | B2M, NGF              |  | 2 |
| Hematological System Development and Function, Immune Cell Trafficking, Inflammatory Response, Tissue Development | Accumulation of granulocytes      | 4.68E-04 | PTGDS, TIMP2          |  | 2 |
| Cellular Movement                                                                                                 | Migration of melanoma cell lines  | 4.91E-04 | NGF, TIMP2            |  | 2 |
| Hematological System Development and Function, Tissue Morphology                                                  | Quantity of myeloid cells         | 5.50E-04 | B2M, NGF, TIMP2       |  | 3 |
| Behavior, Nervous System Development and Function                                                                 | Circadian rhythm                  | 5.71E-04 | NGF, PTGDS            |  | 2 |
| Lipid Metabolism, Molecular Transport, Small Molecule Biochemistry                                                | Concentration of eicosanoid       | 5.71E-04 | NGF, PTGDS            |  | 2 |
| Organismal Injury and Abnormalities, Tissue Morphology                                                            | Volume of lesion                  | 6.22E-04 | NGF, TIMP2            |  | 2 |
| Cell Morphology                                                                                                   | Size of cells                     | 6.66E-04 | B2M, NGF, PTGDS       |  | 3 |
| Neurological Disease, Organismal Injury and Abnormalities                                                         | Degeneration of brain             | 6.93E-04 | NGF, NPC2             |  | 2 |
| Cancer, Hematological Disease, Immunological Disease, Organismal Injury and Abnormalities                         | T-cell non-Hodgkin disease        | 7.27E-04 | B2M, BSPH1, TIMP2     |  | 3 |
| Cancer, Hematological Disease, Immunological Disease, Organismal Injury and Abnormalities                         | T-cell leukemia/lymphoma          | 7.68E-04 | B2M, BSPH1            |  | 2 |



|                                                                                                                   |                                          |          |                              |   |
|-------------------------------------------------------------------------------------------------------------------|------------------------------------------|----------|------------------------------|---|
| Drug Metabolism, Lipid Metabolism, Small Molecule Biochemistry                                                    | Synthesis of prostaglandin E2            | 7.97E-04 | NGF, NPC2                    | 2 |
| Cellular Compromise, Hypersensitivity Response, Inflammatory Response                                             | Degranulation of mast cells              | 8.16E-04 | NGF, PTGDS                   | 2 |
| Neurological Disease                                                                                              | Tremor                                   | 9.18E-04 | NGF, NPC2                    | 2 |
| Cellular Movement                                                                                                 | Cell movement of myeloid cells           | 9.25E-04 | NGF, PTGDS, TIMP2            | 3 |
| Dermatological Diseases and Conditions, Neurological Disease, Organismal Injury and Abnormalities                 | Hyperesthesia                            | 9.39E-04 | NGF, PTGDS                   | 2 |
| Hematological System Development and Function, Immune Cell Trafficking, Inflammatory Response, Tissue Development | Accumulation of phagocytes               | 9.60E-04 | PTGDS, TIMP2                 | 2 |
| Nervous System Development and Function, Tissue Morphology                                                        | Quantity of central nervous system cells | 9.82E-04 | NGF, NPC2                    | 2 |
| Hematological System Development and Function, Immune Cell Trafficking, Inflammatory Response, Tissue Development | Accumulation of mononuclear leukocytes   | 1.03E-03 | B2M, PTGDS                   | 2 |
| Cell Death and Survival                                                                                           | Necrosis                                 | 1.08E-03 | B2M, NGF, NPC2, PTGDS, TIMP2 | 5 |
| Metabolic Disease                                                                                                 | Amyloidosis                              | 1.14E-03 | B2M, NGF, PTGDS              | 3 |
| Cellular Development, Connective Tissue Development and Function                                                  | Differentiation of fibroblast cell lines | 1.28E-03 | NPC2, PTGDS                  | 2 |
| Cell Morphology, Hematological System Development and Function                                                    | Morphology of myeloid cells              | 1.37E-03 | NPC2, PTGDS                  | 2 |
| Cellular Movement                                                                                                 | Migration of myeloid cells               | 1.54E-03 | PTGDS, TIMP2                 | 2 |
| Cell Signaling, Molecular Transport, Nucleic Acid Metabolism, Small Molecule Biochemistry                         | Concentration of cyclic AMP              | 1.58E-03 | NGF, TIMP2                   | 2 |
| Lipid Metabolism, Molecular Transport, Small Molecule Biochemistry                                                | Secretion of lipid                       | 1.61E-03 | NGF, NPC2                    | 2 |
| Lipid Metabolism, Molecular Transport, Small Molecule Biochemistry                                                | Concentration of phospholipid            | 1.87E-03 | NGF, NPC2                    | 2 |
| Hematological System Development and Function, Lymphoid Tissue Structure and Development, Tissue Morphology       | Quantity of lymphocytes                  | 1.92E-03 | B2M, NGF, NPC2               | 3 |
| Cell Death and Survival, Cellular Compromise                                                                      | Cytotoxicity of cells                    | 2.14E-03 | B2M, NGF                     | 2 |
| Cell Morphology, Cellular Function and Maintenance                                                                | Transmembrane potential of mitochondria  | 2.17E-03 | B2M, NGF                     | 2 |

|                                                                                                                               |                                           |          |                  |   |
|-------------------------------------------------------------------------------------------------------------------------------|-------------------------------------------|----------|------------------|---|
| Cellular Movement                                                                                                             | Invasion of carcinoma cell lines          | 2.62E-03 | NGF, TIMP2       | 2 |
| Nucleic Acid Metabolism, Small Molecule Biochemistry                                                                          | Metabolism of cyclic nucleotides          | 2.80E-03 | NGF, TIMP2       | 2 |
| Lipid Metabolism, Molecular Transport, Small Molecule Biochemistry                                                            | Concentration of lipid                    | 2.83E-03 | NGF, NPC2, PTGDS | 3 |
| Cell Death and Survival, Cellular Compromise, Neurological Disease, Tissue Morphology                                         | Degeneration of neurons                   | 2.86E-03 | NGF, NPC2        | 2 |
| Cellular Function and Maintenance, Hematological System Development and Function                                              | Function of T lymphocytes                 | 3.06E-03 | B2M, NPC2        | 2 |
| Nutritional Disease                                                                                                           | Weight loss                               | 3.08E-03 | NGF, NPC2        | 2 |
| Cancer, Hematological Disease, Immunological Disease, Organismal Injury and Abnormalities                                     | Multiple myeloma                          | 3.41E-03 | B2M, TIMP2       | 2 |
| Cell-To-Cell Signaling and Interaction, Nervous System Development and Function                                               | Long-term potentiation                    | 3.48E-03 | B2M, NGF         | 2 |
| Cell Cycle                                                                                                                    | Arrest in G1 phase                        | 3.54E-03 | NGF, TIMP2       | 2 |
| Behavior                                                                                                                      | Emotional behavior                        | 3.81E-03 | B2M, NGF         | 2 |
| Embryonic Development, Organismal Development, Tissue Development                                                             | Growth of embryonic tissue                | 3.81E-03 | NGF, TIMP2       | 2 |
| Cell Death and Survival                                                                                                       | Apoptosis of leukemia cell lines          | 3.90E-03 | B2M, NGF         | 2 |
| Cell Death and Survival                                                                                                       | Apoptosis of breast cancer cell lines     | 4.53E-03 | B2M, NGF         | 2 |
| Cell-To-Cell Signaling and Interaction                                                                                        | Activation of cells                       | 4.71E-03 | B2M, NGF, NPC2   | 3 |
| Cellular Growth and Proliferation                                                                                             | Expansion of cells                        | 4.88E-03 | B2M, NGF         | 2 |
| Organismal Injury and Abnormalities                                                                                           | Discomfort                                | 4.92E-03 | NGF, TIMP2       | 2 |
| Immunological Disease, Inflammatory Disease, Inflammatory Response, Neurological Disease, Organismal Injury and Abnormalities | Experimental autoimmune encephalomyelitis | 5.18E-03 | B2M, NGF         | 2 |
| Cell Signaling, Molecular Transport, Vitamin and Mineral Metabolism                                                           | Mobilization of Ca <sup>2+</sup>          | 5.70E-03 | B2M, NGF         | 2 |
| Cardiovascular Disease, Organismal Injury and Abnormalities                                                                   | Infarction                                | 6.46E-03 | NGF, PTGDS       | 2 |
| Cardiovascular System Development and Function                                                                                | Development of vasculature                | 6.73E-03 | NGF, NPC2, TIMP2 | 3 |
| Embryonic Development, Organismal Development                                                                                 | Development of body trunk                 | 7.16E-03 | B2M, NGF, NPC2   | 3 |
| Cardiovascular System Development and Function                                                                                | Morphology of                             | 7.48E-03 | NPC2, TIMP2      | 2 |

|                                                                                                   |                                                |          |                        |   |
|---------------------------------------------------------------------------------------------------|------------------------------------------------|----------|------------------------|---|
|                                                                                                   | vasculature                                    |          |                        |   |
| Cell Morphology, Cellular Development                                                             | Branching of cells                             | 8.43E-03 | NGF, TIMP2             | 2 |
| Organismal Survival                                                                               | Organismal death                               | 8.93E-03 | B2M, NGF, NPC2, TIMP2  | 4 |
| Immunological Disease                                                                             | Hypersensitive reaction                        | 9.65E-03 | NGF, PTGDS             | 2 |
| Cellular Development, Nervous System                                                              | Differentiation of neurons                     | 9.91E-03 | NGF, TIMP2             | 2 |
| Development and Function, Tissue Development                                                      |                                                |          |                        |   |
| Cell Death and Survival                                                                           | Apoptosis of neurons                           | 1.04E-02 | NGF, PTGDS             | 2 |
| Nervous System Development and Function                                                           | Development of Visual system                   | 1.14E-02 | NGF, TIMP2             | 2 |
| Cell Death and Survival                                                                           | Apoptosis                                      | 1.22E-02 | B2M, NGF, PTGDS, TIMP2 | 4 |
| Infectious Diseases                                                                               | Replication of RNA virus                       | 1.26E-02 | B2M, NGF               | 2 |
| Cellular Development, Cellular Growth and Proliferation                                           | Cell proliferation of breast cancer cell lines | 1.28E-02 | NGF, TIMP2             | 2 |
| Molecular Transport                                                                               | Quantity of metal                              | 1.29E-02 | B2M, NGF               | 2 |
| Cell Cycle                                                                                        | Mitosis                                        | 1.36E-02 | NGF, TIMP2             | 2 |
| Cell Morphology, Nervous System Development and Function, Neurological Disease, Tissue Morphology | Abnormal morphology of neurons                 | 1.38E-02 | B2M, NGF               | 2 |

---
